# Supplementary material for: Long-Circulating Hyaluronan-Based Nanohydrogels as Carriers of Hydrophobic Drugs
Source: Pharmaceutics. 2018 Nov 3;10(4):213. doi: 10.3390/pharmaceutics10040213 (PMC6320896; doi:10.3390/pharmaceutics10040213)
Supplement: Supplementary file 1 [file pharmaceutics-10-00213-s001.pdf]

## Supplementary Materials

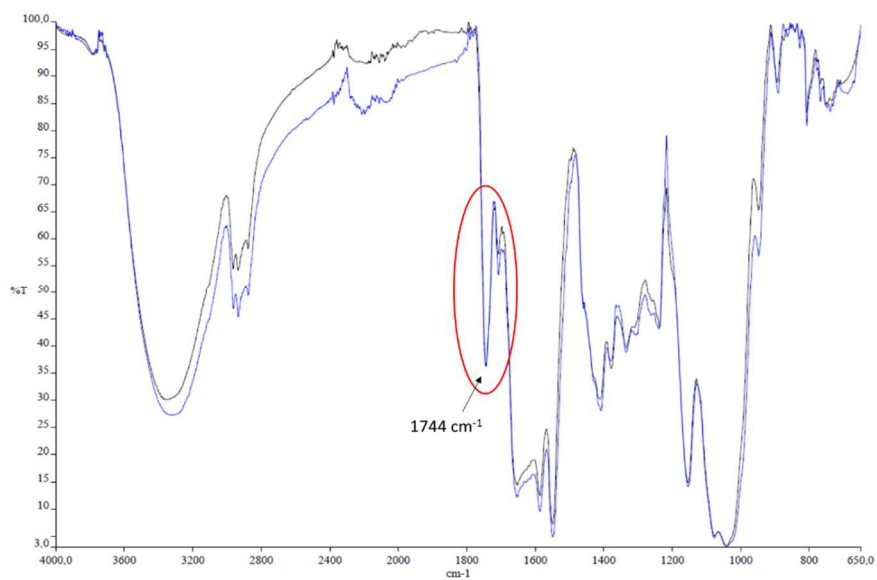

**Figure S1:** FT-IR ATR spectra of HA-Rfv (black) and HA-Rfv after autoclave treatment (blue). The ester C=O stretching peak at 1744 cm<sup>-1</sup> is evidenced

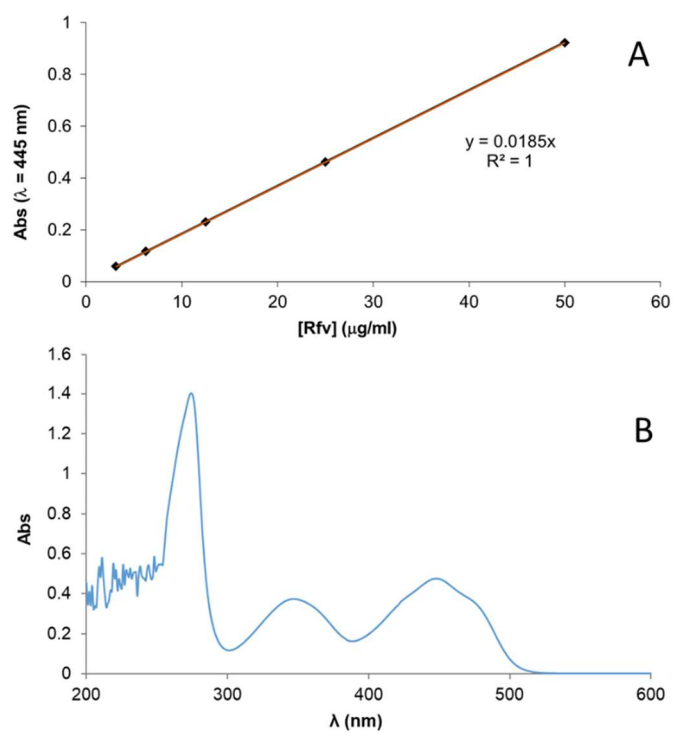

**Figure S2:** UV-Vis calibration curve of Rfv in DMSO at  $\lambda = 445$  nm (A); HA-Rfv UV-Vis spectrum at 100  $\mu\text{g/ml}$  in DMSO (B)

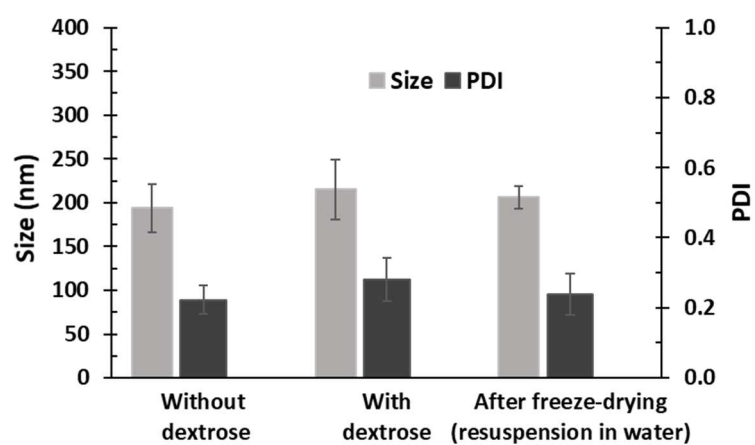

**Figure S3:** Mean dimensions and PDI of NHs before and after the addition of dextrose ( $C_t = 1\%$  w/V), and after freeze-drying and re-suspension in water

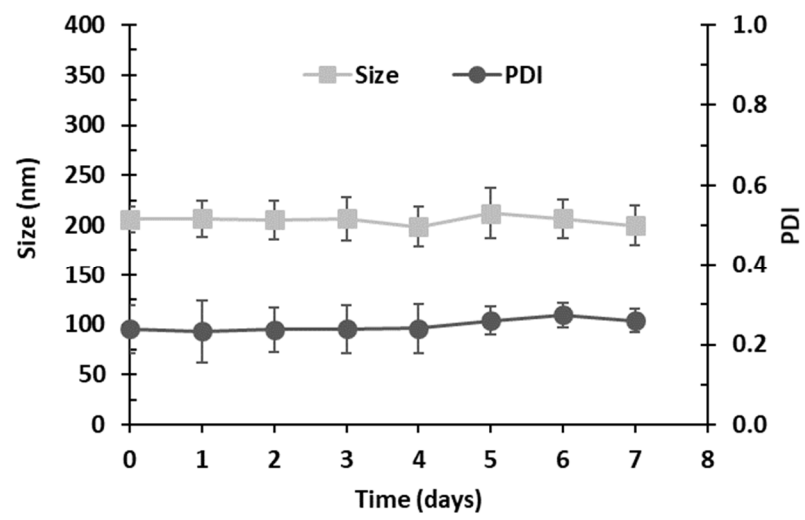

**Figure S4:** Stability at 4 °C of NHs freeze-dried and re-suspended in water

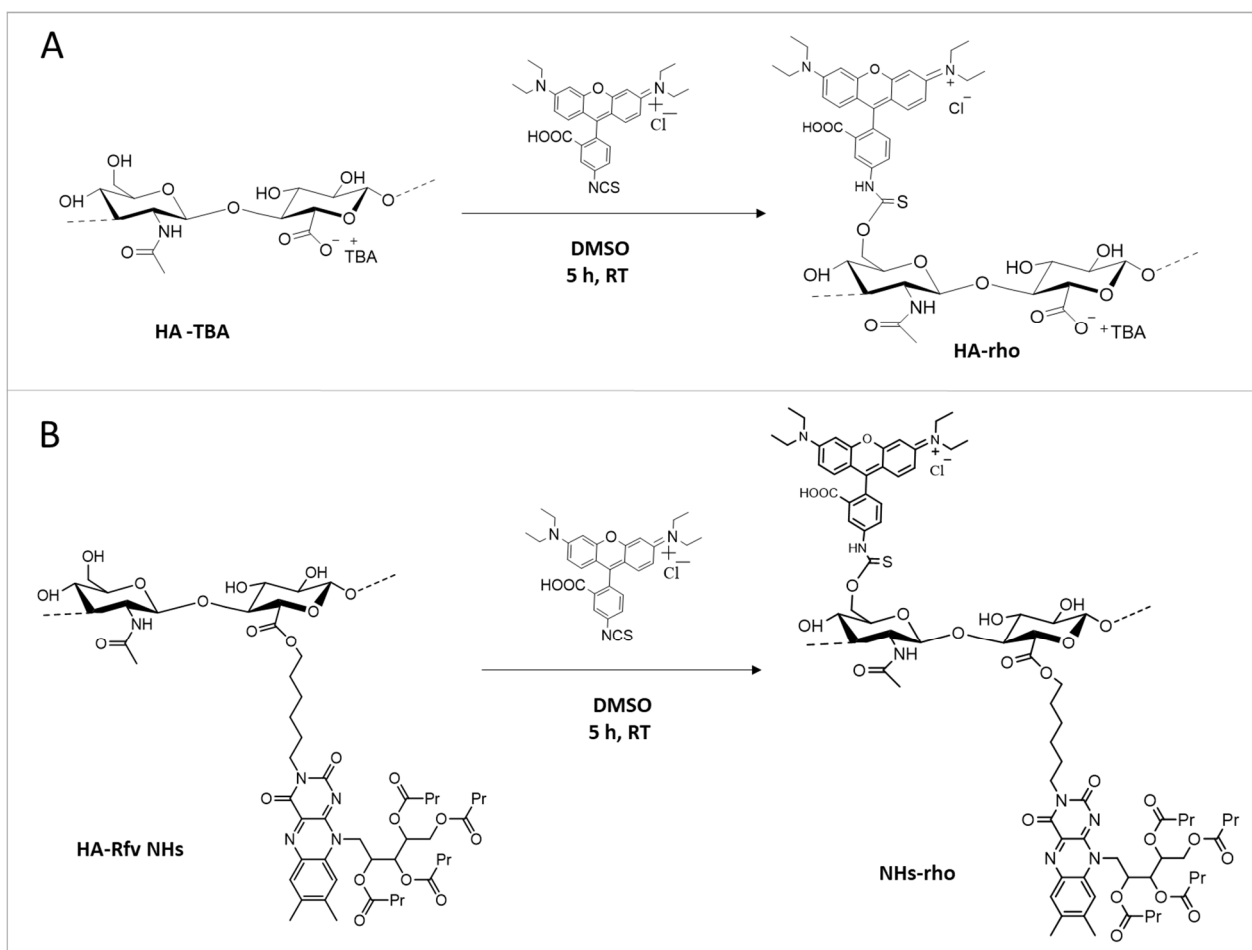

**Figure S5:** Scheme of reactions of (A) HA-TBA and of (B) HA-Rfv in the form of NHs with Rhodamine B isothiocyanate

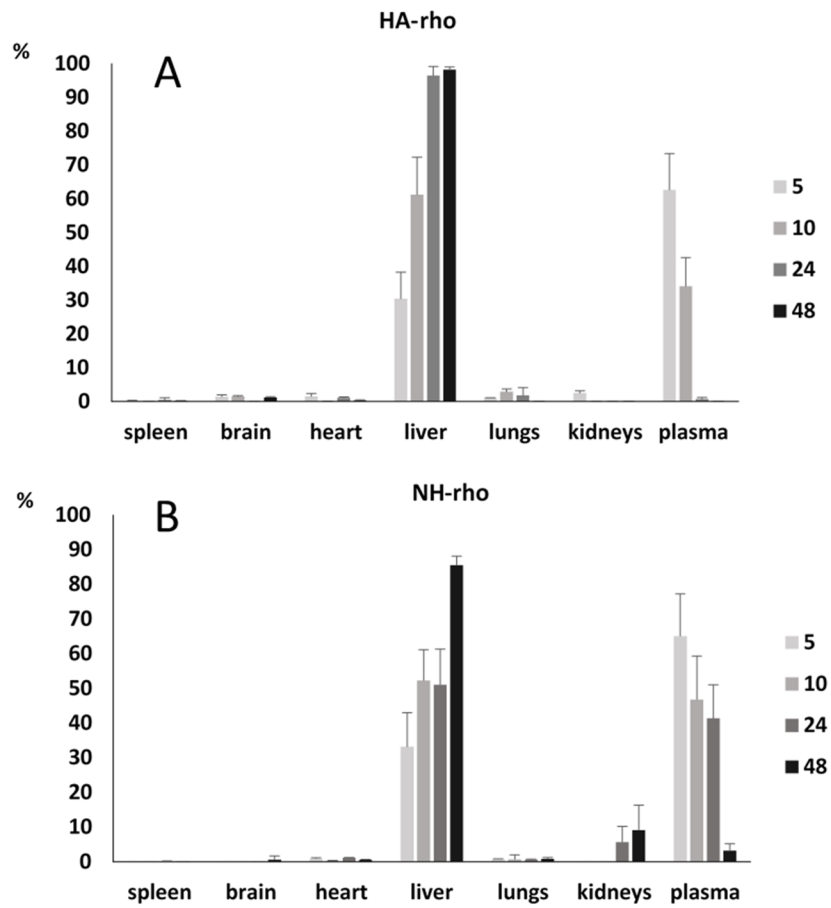

**Figure S6:** Percentage of accumulation of A) HA and B) NHs at 5, 10, 24 and 48 h of intravenous administration in plasma and analyzed organs

**Table S1:** Size and PDI of NHs after freeze-drying ad re-suspension in water, and after the addition of glycerol 2.28 % w/V and PBS 0.01 M, pH 7.4

| NHs                         | Size (nm) | PDI         |
|-----------------------------|-----------|-------------|
| Water (after freeze-drying) | 204 ± 20  | 0.23 ± 0.06 |
| + Glycerol (2.28 % w/V)     | 217 ± 20  | 0.22 ± 0.08 |
| + PBS 0.01M, pH = 7.4       | 219 ± 19  | 0.22 ± 0.04 |

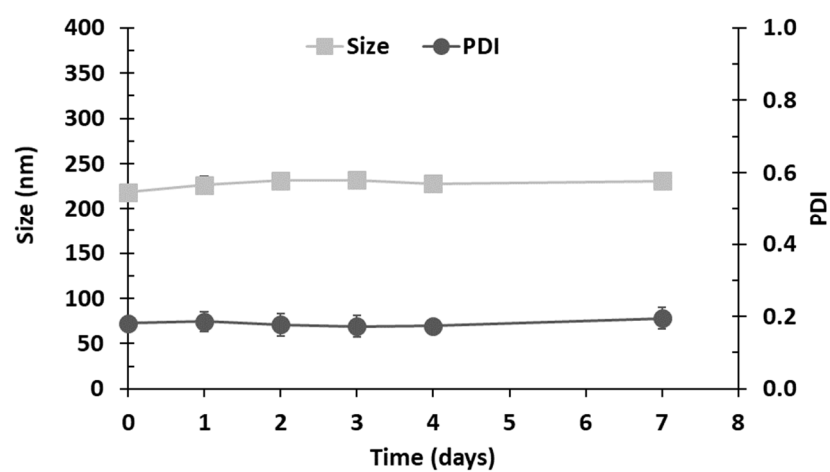

**Figure S7:** Stability at 4°C of the piroxicam-loaded NHs formulation in glycerol 2.28% w/V and PBS 0.01 M, pH = 7.4
